# Supplementary material for: EGR1/GADD45α Activation by ROS of Non-Thermal Plasma Mediates Cell Death in Thyroid Carcinoma
Source: MDPI journal article supplement (doi:10.3390/cancers13020351), 2021-01-19
Supplement: s1 [file s1]

Supplementary Materials

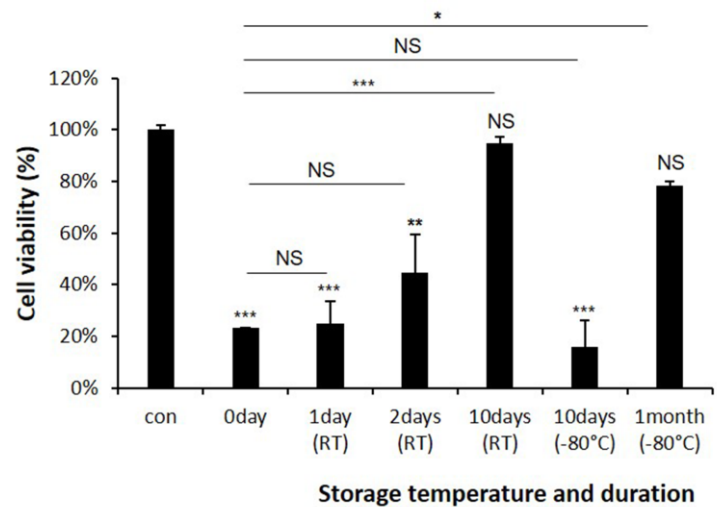

**Figure S1.** The effect of NTPAM according to storage temperature and duration. 2 h dose-NTPAM was stored at  $-80^{\circ}\text{C}$  and room temperature (RT) for 0, 1, 2, 10 days or 1month. NTPAMs of various conditions were exposed to BCPAP cells for 24 h and cell viability was evaluated using the WST1 assay. Each figure is representative of three independent experiments. Results were analyzed using non-parametric one-way ANOVA followed by Dunnett's post-hoc test. Data were expressed as mean  $\pm$  standard deviation of the mean ( $\pm$ SD). Differences were considered relevant at  $p < 0.05$  (\*  $p < 0.05$ , \*\*  $p < 0.01$ , \*\*\*  $p < 0.001$ ).

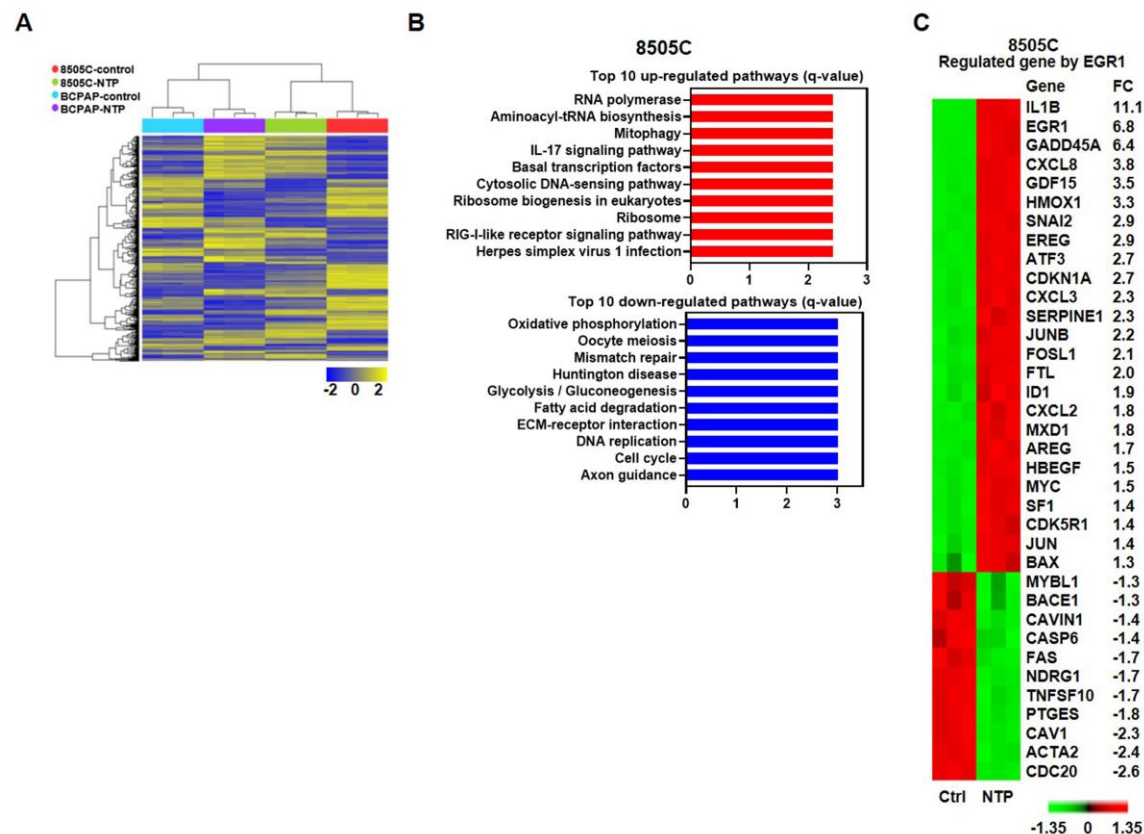

**Figure S2.** Transcriptomic analysis in thyroid cancer cells  $\pm$  treatment with NTPAM. (A) Heatmap analysis of the significant changed genes with P value  $< 0.05$  and Fold change  $> 2$  comparing with or without NTPAM treatment in BCPAP cells and 8505C cells (B) Top 10 up-regulated pathway and top 10 down-regulated pathways in 8505C cells in relation to NTPAM treatment. (C) Heatmap analysis of the significant changed genes related with EGR1 with P value  $< 0.05$  comparing with or without NTPAM treatment in 8505C cells.

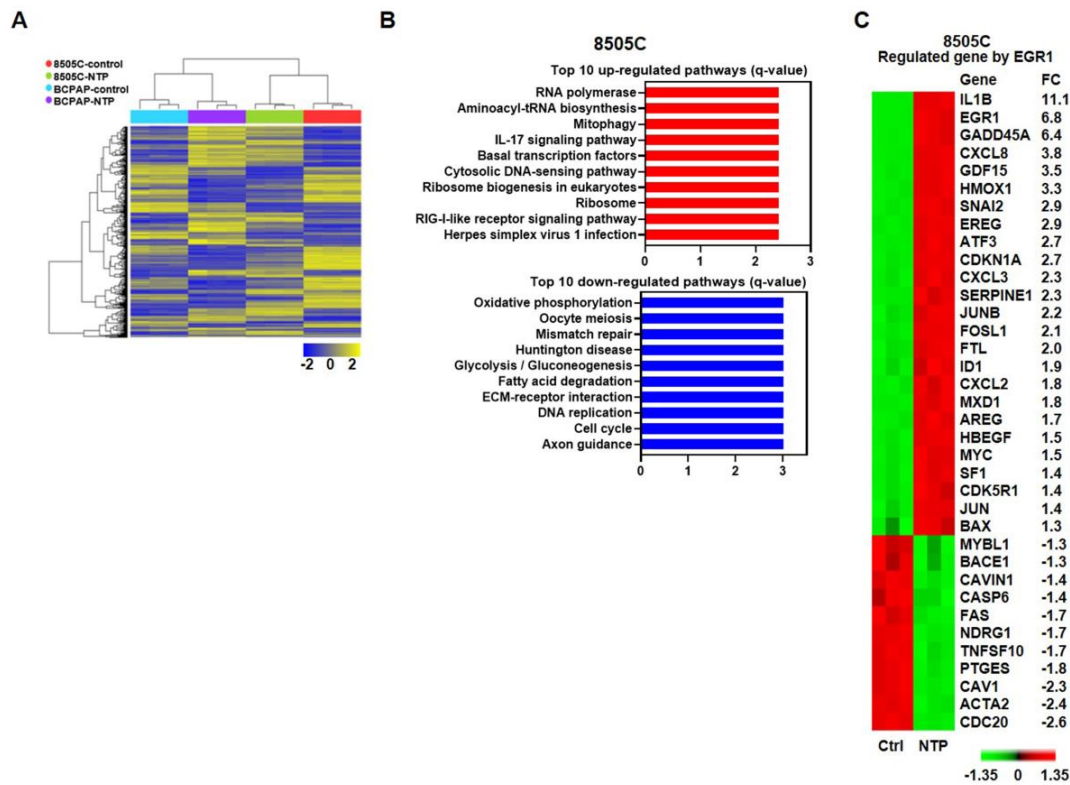

**Figure S3. The effect of ATF4 in NTPAM-treated cell viability.** BCPAP cells were transfected with or without ATF4-specific siRNA for 48 h, and then cells were treated with 2h dose-NTPAM for 24h. Cell viability was evaluated using the WST1 assay. Each figure is representative of three independent experiments. Results were analyzed using non-parametric one-way ANOVA followed by Dunnett's post-hoc test. Data were expressed as mean  $\pm$  standard deviation of the mean ( $\pm$  SD). Differences were considered relevant at  $p < 0.05$  (\*  $p < 0.05$ , \*\*  $p < 0.01$ , \*\*\*  $p < 0.001$ ).

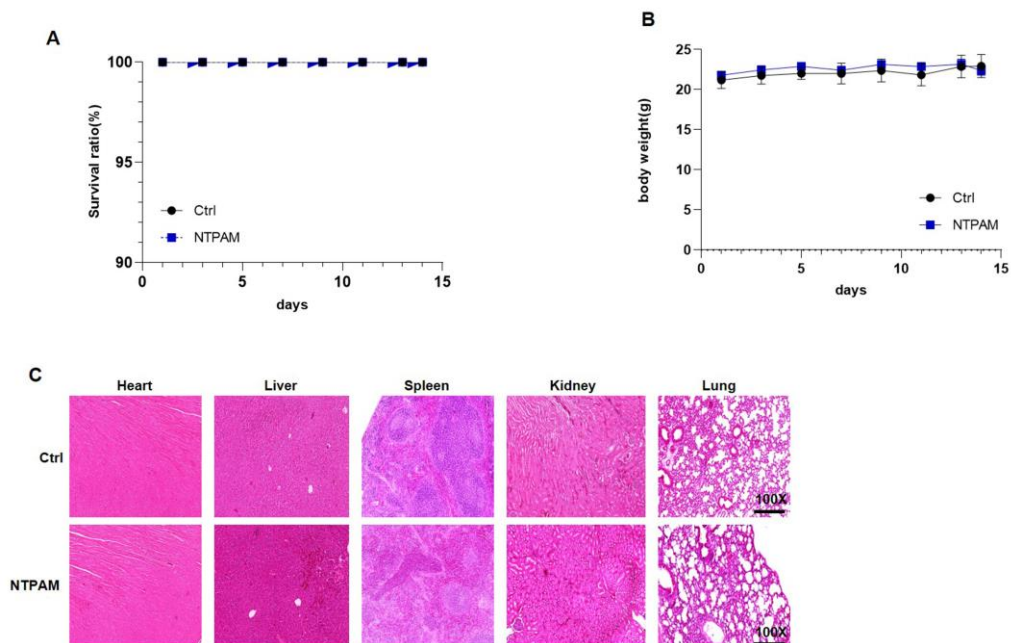

**Figure S4. In vivo cytotoxic effect evaluation of NTPAM.** 2 h dose-NTPAM was given to mice (C57BL/6, 6weeks, 4mice) by intraperitoneal injection (100 $\mu$ L) once daily for 2weeks. Survival ratio (A) and body weight (B) were monitored. C. Representative images (100X) of H&E staining of Major organs after the NTPAM treatments.

**Table S1.** Comparison of clinico-pathologic findings in relation to *EGR1* mRNA expression level in the THCA cohort.

| Variables                             |                   | Number of Patients | EGR1 Expression |              | <i>p</i> - Value |
|---------------------------------------|-------------------|--------------------|-----------------|--------------|------------------|
|                                       |                   |                    | Low (N=250)     | High (N=250) |                  |
| Age (years) (mean ± SD)               |                   |                    | 48.1±16.1       | 16.4±15.6    | 0.228            |
| Gender (n, %)                         | Male              | 135                | 78(31.2)        | 57(22.8)     | 0.034*           |
|                                       | Female            | 365                | 172(68.8)       | 193(77.2)    |                  |
| Tumor size, mm (mean ± SD)            |                   |                    | 1.65±1.19       | 1.30±1.04    | 0.014*           |
| T stage (n, %)                        | T1-T2             | 308                | 162(64.8)       | 146(58.4)    | 0.141            |
|                                       | T3-T4             | 192                | 88(35.2)        | 104(41.6)    |                  |
| Extrathyroidal extension (n, %)       | No                | 348                | 164(65.6)       | 184(73.6)    | 0.056            |
|                                       | Minimal           | 134                | 73(29.2)        | 61(24.4)     |                  |
|                                       | Moderate/Advanced | 18                 | 13(5.2)         | 5(2.0)       |                  |
| Lymph node metastasis (n, %)          | No                | 277                | 124(49.6)       | 153(61.2)    | 0.009*           |
|                                       | N1a               | 151                | 91(36.4)        | 60(24.0)     |                  |
|                                       | N1b               | 72                 | 35(14.0)        | 37(14.8)     |                  |
| M stage (n, %)                        | M0                | 492                | 245(98.0)       | 247(98.8)    | 0.476            |
|                                       | M1                | 8                  | 5(2.0)          | 3(1.2)       |                  |
| Stage (n, %)                          | I                 | 284                | 136(54.4)       | 148(59.2)    | 0.146            |
|                                       | II                | 52                 | 21(8.4)         | 31(12.4)     |                  |
|                                       | III               | 111                | 63(25.2)        | 48(19.2)     |                  |
|                                       | IV                | 53                 | 30(12.0)        | 23(9.2)      |                  |
|                                       | No                | 254                | 119(47.6)       | 135(54.0)    |                  |
| BRAF <sup>V600E</sup> mutation (n, %) | Yes               | 232                | 123(49.2)       | 109(43.6)    | 0.288            |
|                                       | Fusion            | 9                  | 4(1.6)          | 5(2.0)       |                  |
|                                       | Other mutation    | 5                  | 4(1.6)          | 1(0.4)       |                  |

*p* values from unpaired *t*-tests for continuous parametric variables and the Mann–Whitney U-test for nonparametric variables. The chi-square test and Fisher's exact test were used to evaluate the significance of the correlations of *EGR1* expression with clinical and pathological parameters. TNM classification from AJCC(American Joint Committee on Cancer) 7<sup>th</sup> edition was used. \* *p* < 0.05 between the two categories for a given variable.

**Table S2.** Multivariable regression analysis of *EGR1* expression associated with the clinic-pathological parameters.

| Factors          |                  | Exp(β) | SE    | 95.0% CI       | <i>p</i> -Value |
|------------------|------------------|--------|-------|----------------|-----------------|
| Tumor size > 2cm | Age              | 0.9    | 0.006 | (0.980, 1.004) | 0.183           |
|                  | High <i>EGR1</i> | 1.138  | 0.196 | (0.775, 1.670) | 0.510           |
|                  | Low <i>EGR1</i>  |        |       |                |                 |
| LN metastasis    | Age              | 1.015  | 0.006 | (1.004, 1.027) | 0.010*          |
|                  | High <i>EGR1</i> | 0.604  | 0.183 | (0.422, 0.865) | 0.006*          |
|                  | Low <i>EGR1</i>  |        |       |                |                 |

Multivariate logistic regression analysis was performed to calculate OR and 95% CI for each covariable. The final multivariate model was based upon a stepwise method for clinical factors associated with *EGR1* expression in univariate models. \* *P* < 0.05 between the two categories for a given variable. SE, standard error, Exp(β); OR, odds ratio, CI; confidence interval.
