# Supplementary figures and images for: EGR1/GADD45α Activation by ROS of Non-Thermal Plasma Mediates Cell Death in Thyroid Carcinoma
Source: MDPI journal article supplement (doi:10.3390/cancers13020351), 2021-01-19

Figure 1.

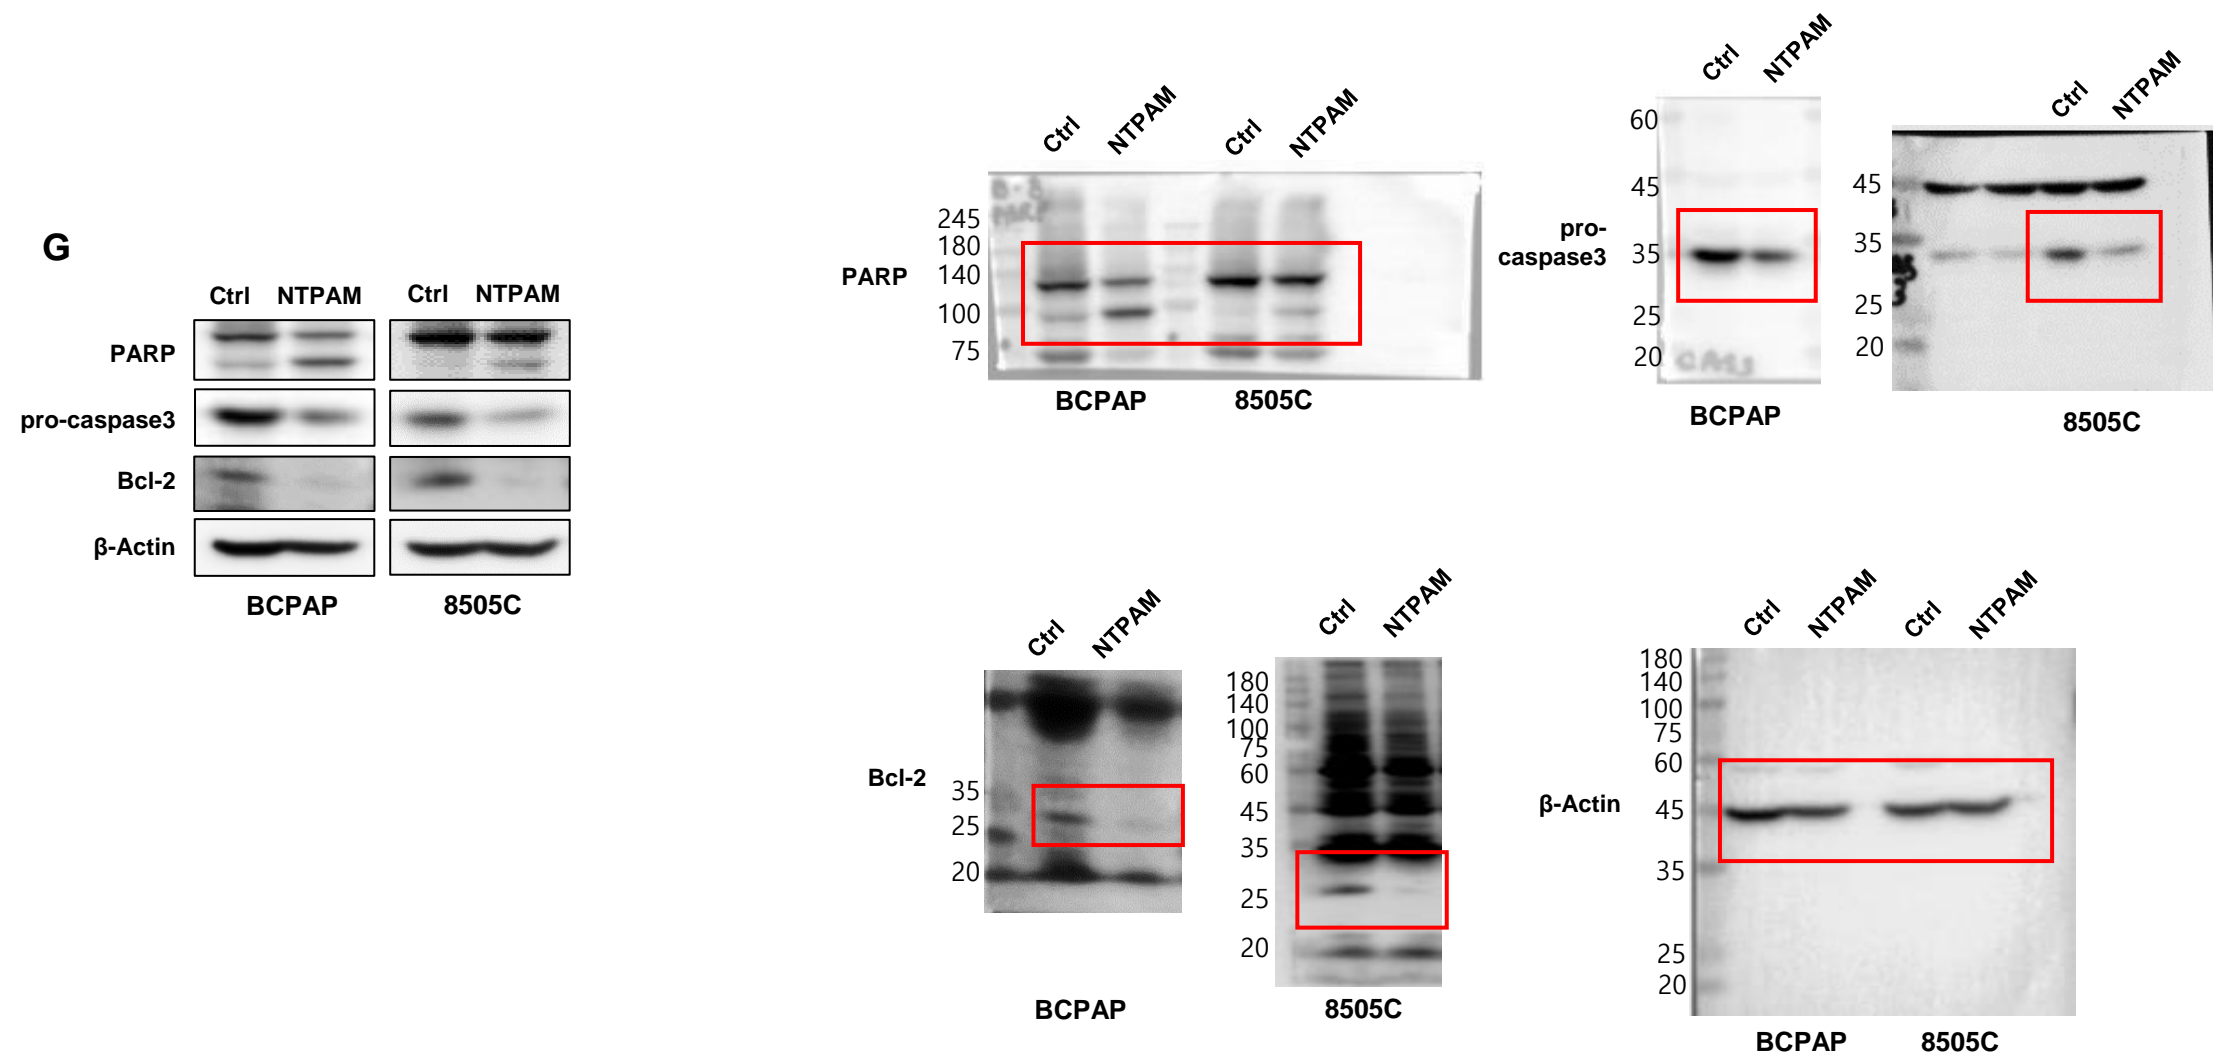

Figure 4.

C

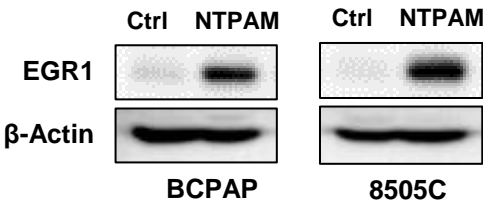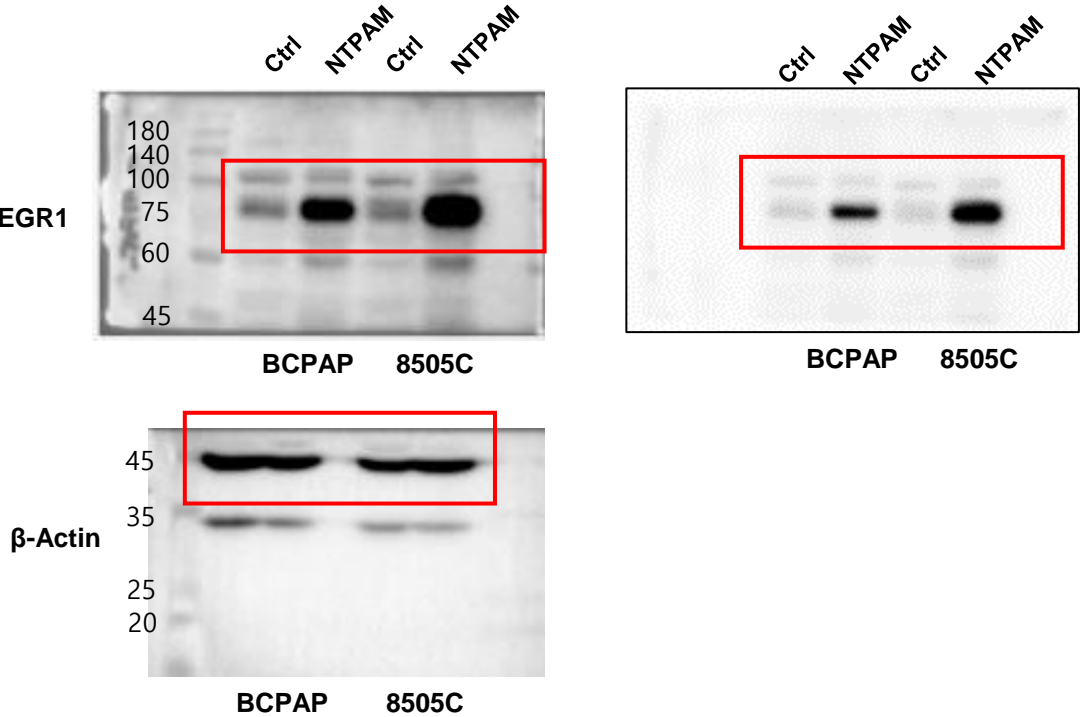

D

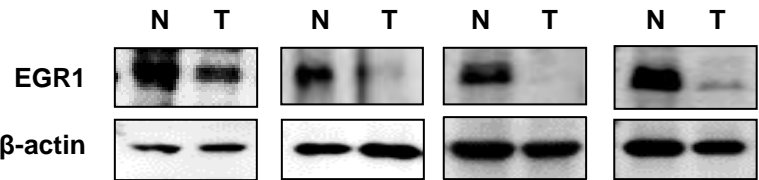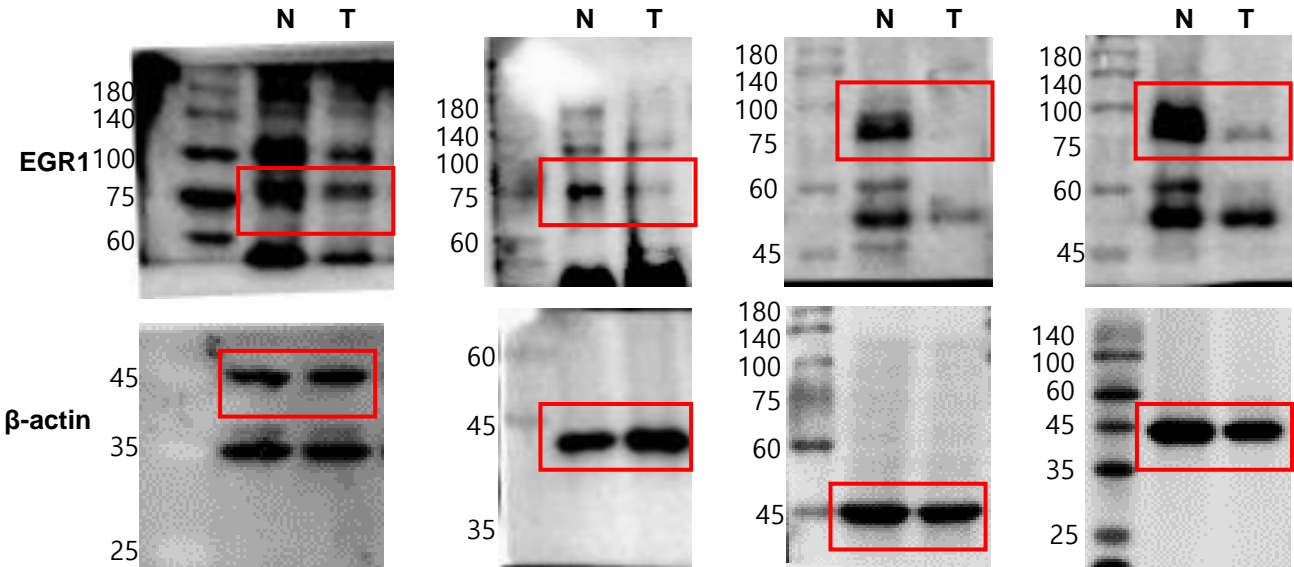

Figure 4.

E

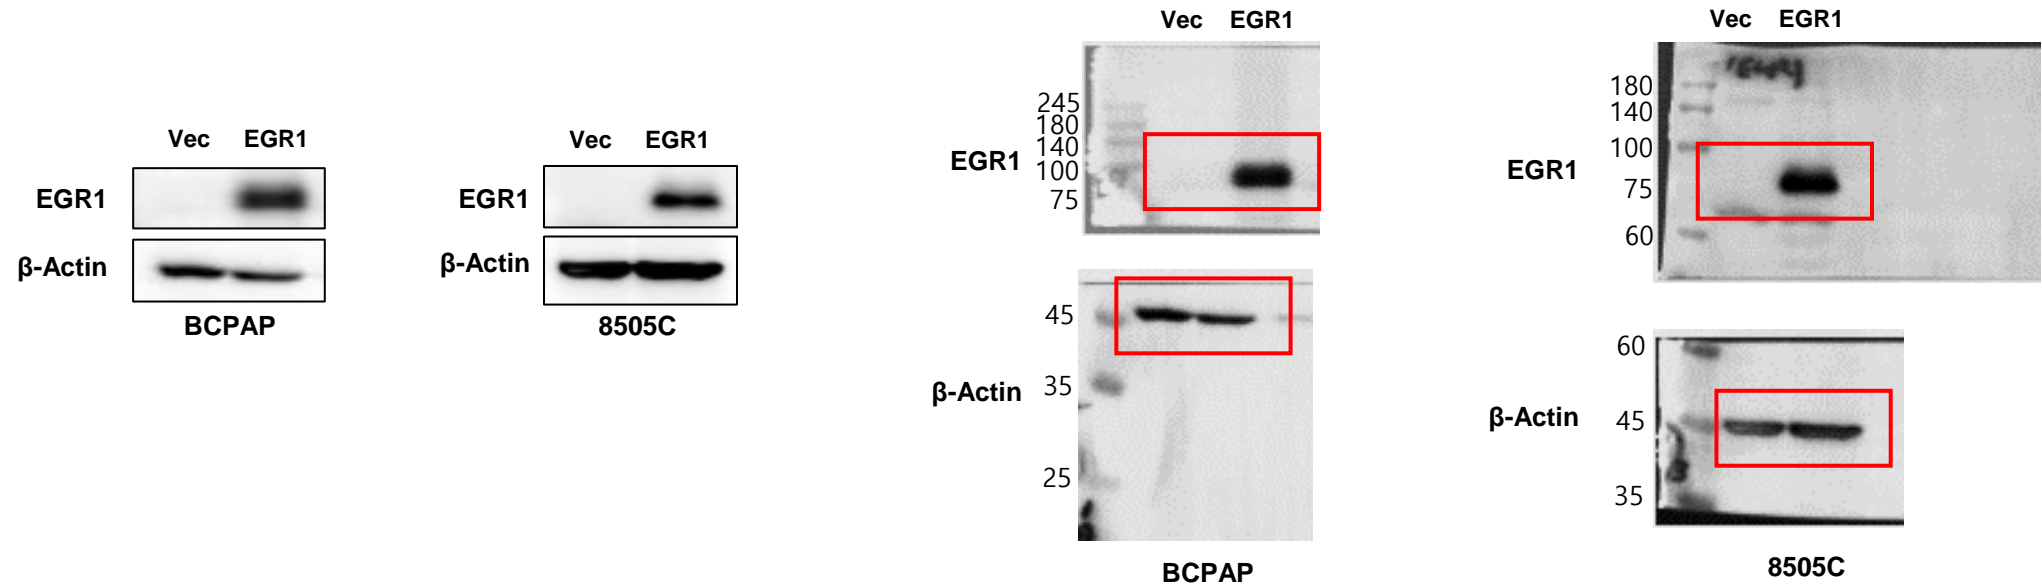

F

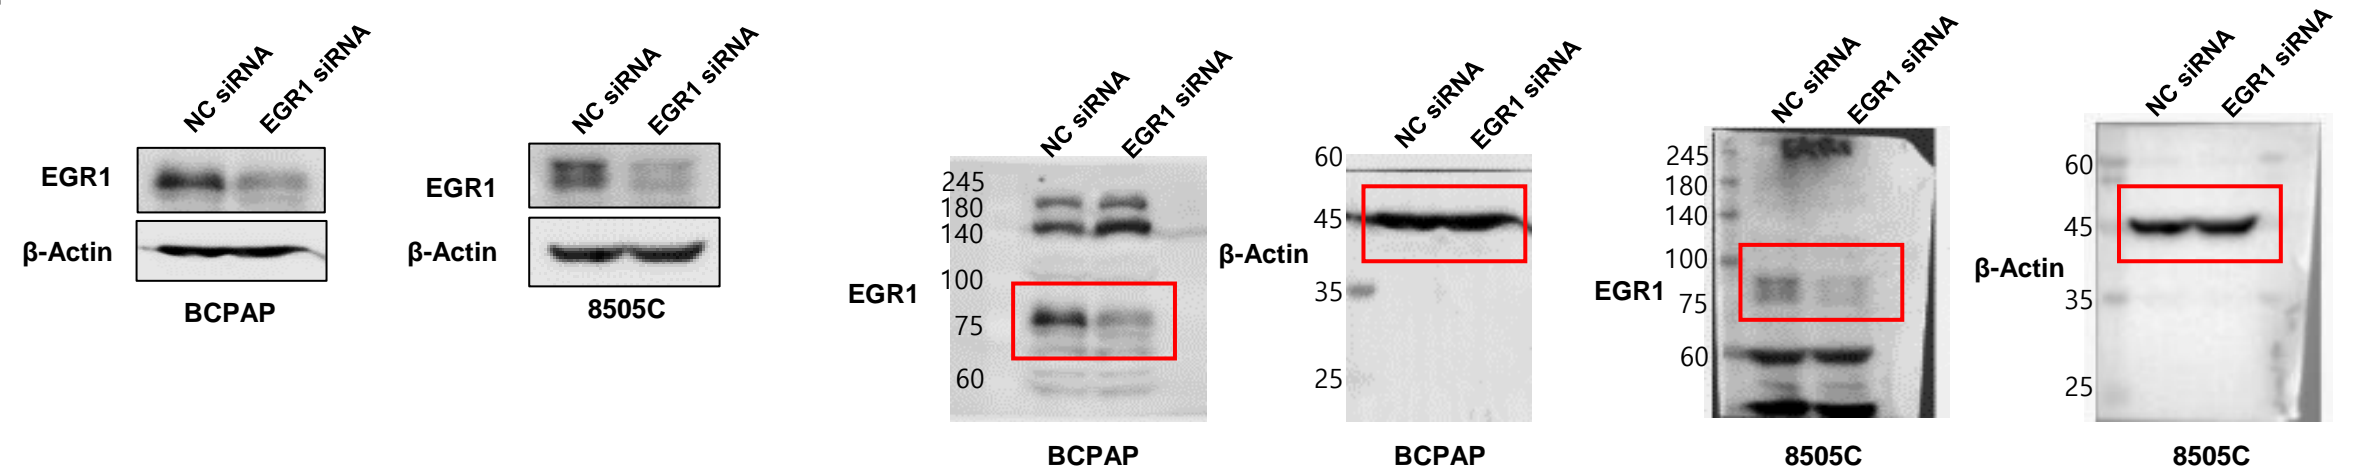

**C**

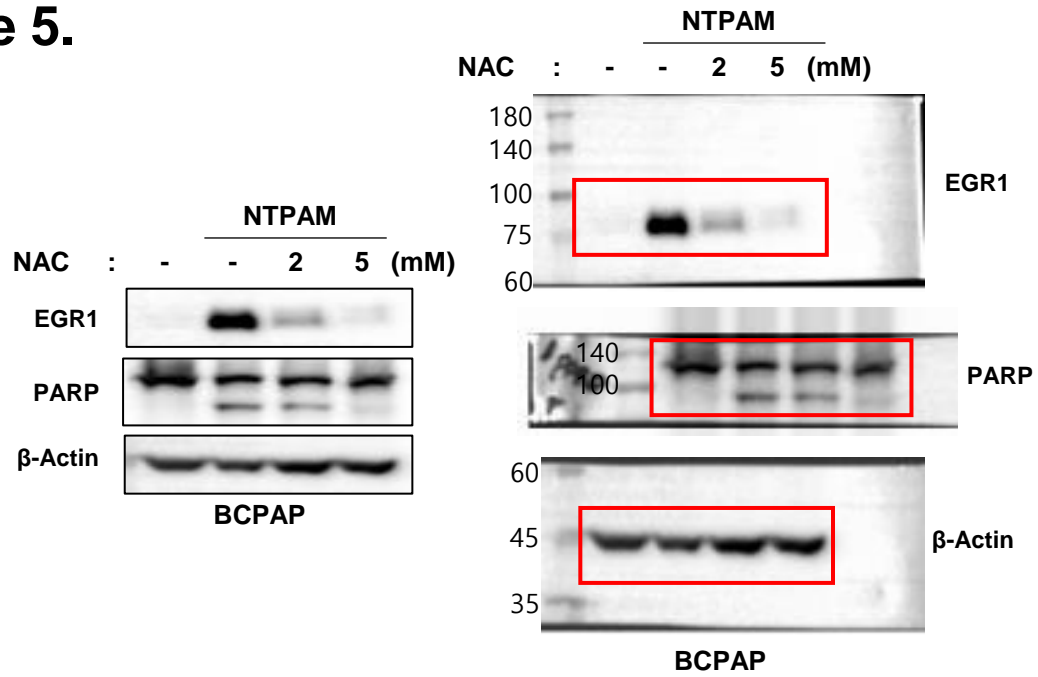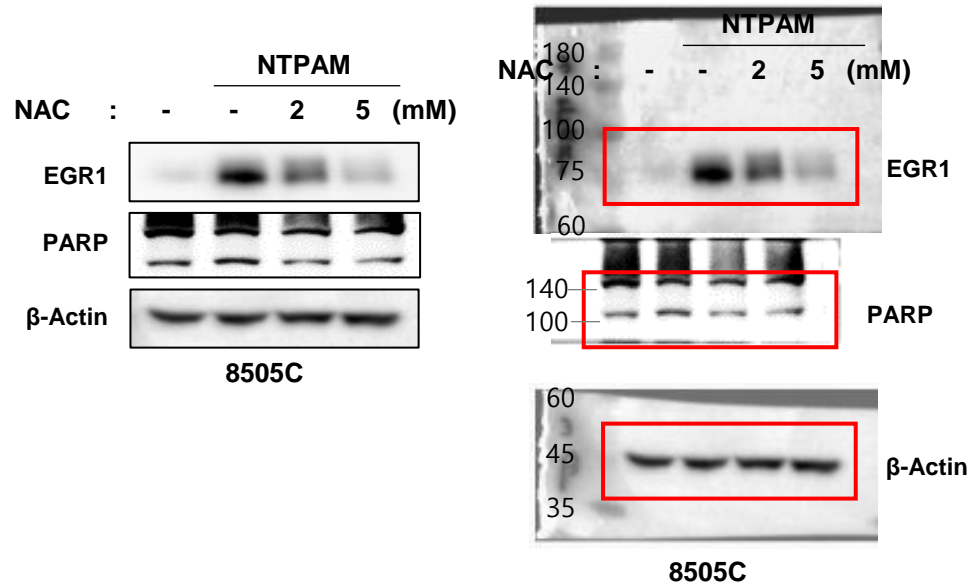

D

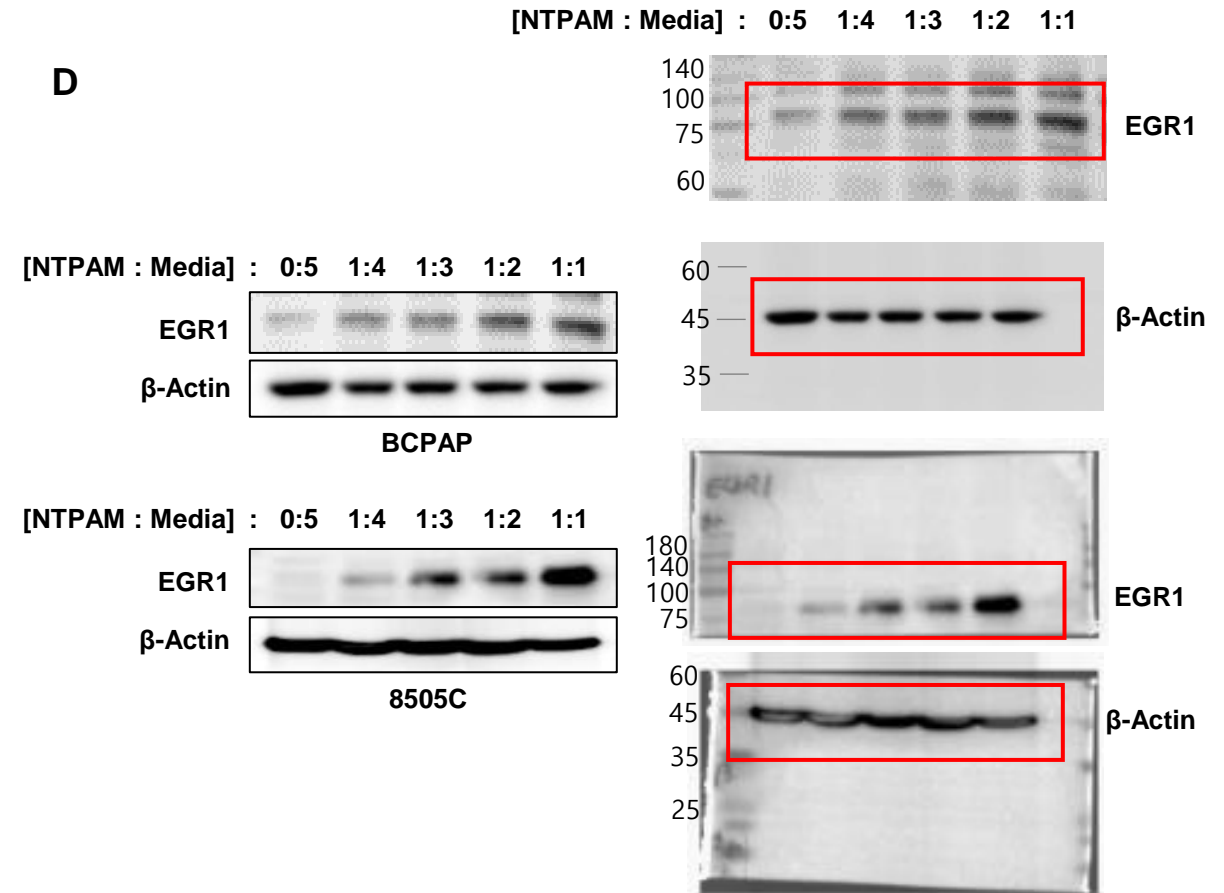

**Figure 6.**

**C**

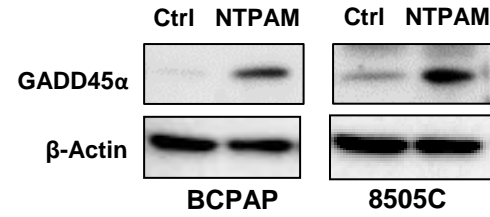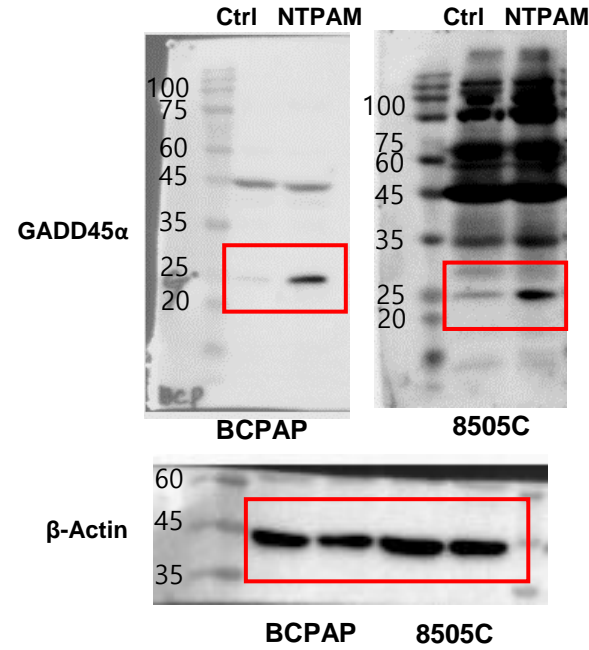

**H**

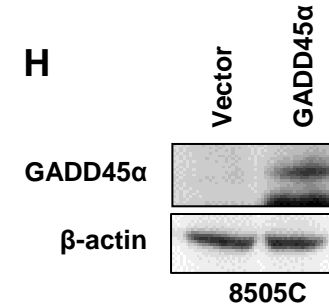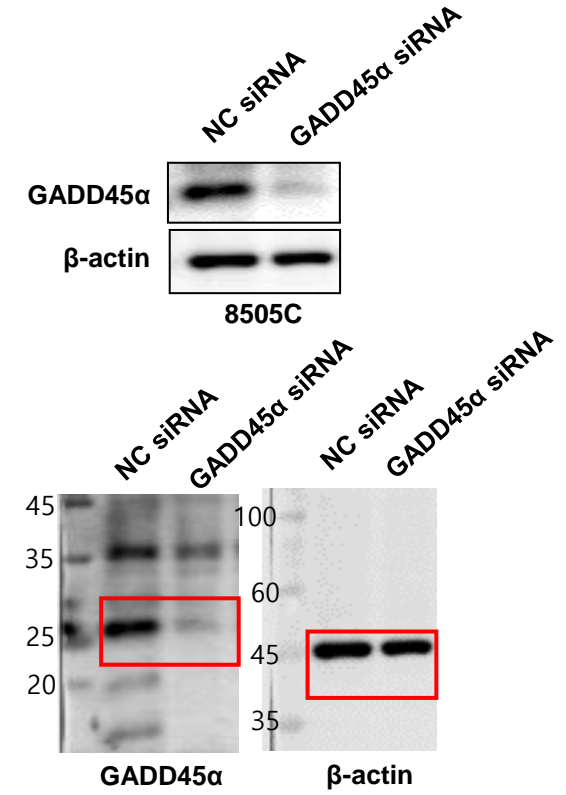

**D**

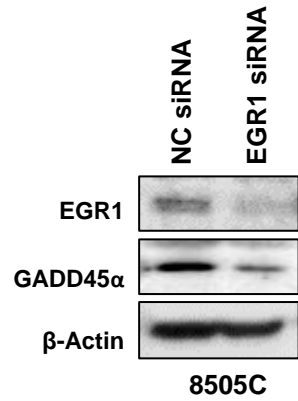

**E**

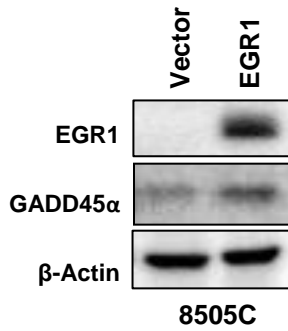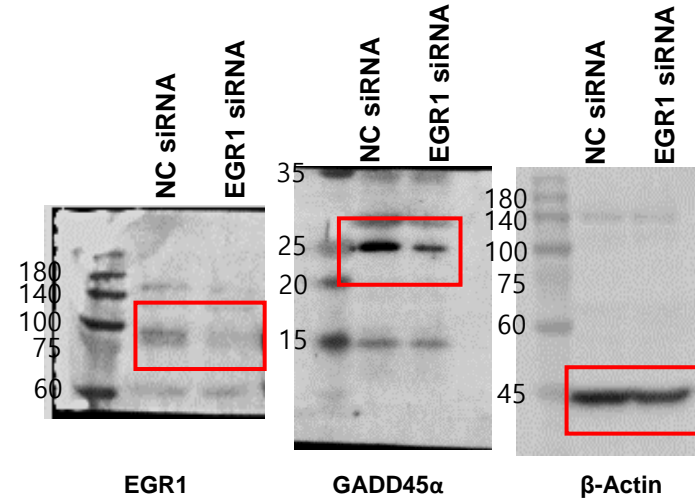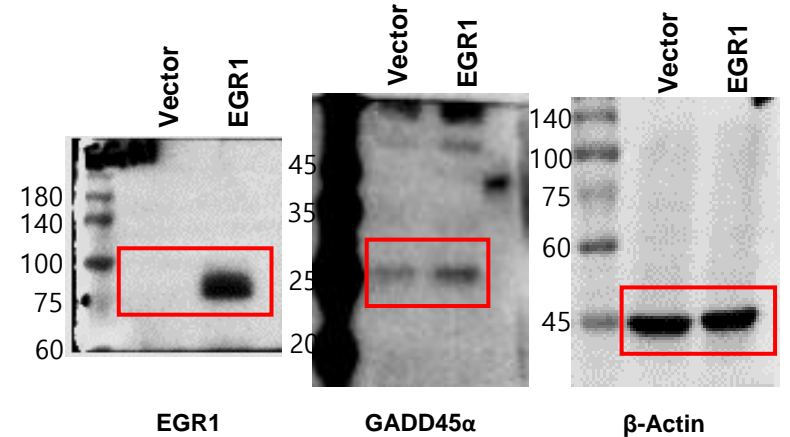

Supplement: s1 [file s1]
